# Supplementary material for: Exploration of Free Energy Surface and Thermal Effects on Relative Population and Infrared Spectrum of the Be6B11− Fluxional Cluster
Source: MDPI journal article supplement (doi:10.3390/ma14010112), 2020-12-29
Supplement: s1 [file s1]

Supplementary information

# Exploration of Free Energy Surface and Thermal Effects on Relative Population and Infrared Spectrum of the $\text{Be}_6\text{B}_{11}^-$ Fluxional Cluster

The XYZ cartesian atomic coordinates  $\text{Be}_6\text{B}_{11}^-$

17

```
0.000000000      Be6B11_0000.out
Be  0.871471000000  -2.240509000000  0.377306000000
Be  -1.189569000000  0.091524000000  -1.070090000000
Be  -1.553783000000  -0.035182000000  1.029073000000
Be  0.353918000000  0.927628000000  1.191148000000
B   -2.388865000000  -1.286223000000  -0.191009000000
Be  0.902109000000  0.576938000000  -1.026034000000
B    2.138354000000  1.405375000000  0.186226000000
B    2.104451000000  -1.290639000000  -0.677320000000
B   -0.695071000000  2.012979000000  -0.103576000000
B   -2.937178000000  0.167009000000  -0.293782000000
B   -0.966176000000  -1.813381000000  0.224983000000
B    0.854208000000  2.267959000000  0.001131000000
B    1.541700000000  -0.519470000000  0.705420000000
B   -2.190898000000  1.507723000000  -0.161535000000
B    2.776437000000  0.070546000000  -0.362169000000
Be  0.251303000000  -1.389407000000  -1.254458000000
B    0.054679000000  -0.866672000000  1.274075000000
17  0.617460000      Be6B11_0001.out
Be  -1.462704000000  -0.014249000000  0.967655000000
B    2.728694000000  0.030013000000  -0.619010000000
B   -2.146695000000  -1.259141000000  -0.336682000000
B    2.196858000000  1.375491000000  0.031415000000
B   -0.880491000000  -1.823626000000  0.448212000000
B    1.934511000000  -1.299414000000  -0.736505000000
B   -0.694414000000  1.931806000000  0.025551000000
Be  0.874964000000  0.501056000000  -0.992441000000
B   -2.883951000000  0.123283000000  -0.317897000000
Be  1.826138000000  -0.480368000000  0.902917000000
Be  0.408897000000  0.951482000000  1.344252000000
B    0.772439000000  -1.870483000000  0.277861000000
```

```

B    -2.220982000000    1.503653000000    -0.070210000000
Be   -0.113249000000    -1.338601000000    -1.218981000000
B     0.106145000000    -0.876434000000    1.446090000000
B     0.872097000000    2.199862000000    0.022620000000
Be   -1.264310000000    0.336919000000    -1.217707000000
17

```

```

0.855910000    Be6B11_0002.out
Be   -0.597631000000    1.124894000000    1.052561000000
Be   -0.597631000000    1.124894000000    -1.052561000000
B    -2.238140000000    -1.547111000000    0.000000000000
B     1.559153000000    1.828212000000    0.000000000000
Be   -0.597631000000    -1.125067000000    1.051152000000
B     0.289604000000    2.707478000000    0.000000000000
B    -2.209386000000    0.001996000000    0.000000000000
B    -1.233725000000    2.689543000000    0.000000000000
B    -2.233185000000    1.551289000000    0.000000000000
Be    1.279363000000    0.001246000000    -1.086218000000
Be    1.279363000000    0.001246000000    1.086218000000
B    -1.242591000000    -2.688862000000    0.000000000000
Be   -0.597631000000    -1.125067000000    -1.051152000000
B     2.675935000000    0.757041000000    0.000000000000
B     0.280383000000    -2.711048000000    0.000000000000
B     2.670570000000    -0.762843000000    0.000000000000
B     1.546820000000    -1.827411000000    0.000000000000

```

```

17
1.230527500    Be6B11_0003.out

```

---

|    |                 |                 |                 |
|----|-----------------|-----------------|-----------------|
| B  | 0.000000000000  | 1.549129000000  | 2.235698000000  |
| B  | 0.000000000000  | 1.827820000000  | −1.553909000000 |
| B  | 0.000000000000  | −0.759893000000 | −2.673713000000 |
| B  | 0.000000000000  | −2.707671000000 | −0.285066000000 |
| B  | 0.000000000000  | −1.549129000000 | 2.235698000000  |
| B  | 0.000000000000  | −1.827820000000 | −1.553909000000 |
| B  | 0.000000000000  | 0.759893000000  | −2.673713000000 |
| B  | 0.000000000000  | 2.707671000000  | −0.285066000000 |
| B  | 0.000000000000  | 2.688931000000  | 1.237960000000  |
| B  | 0.000000000000  | 0.000000000000  | 2.207900000000  |
| B  | 0.000000000000  | −2.688931000000 | 1.237960000000  |
| Be | 1.052108000000  | 1.124714000000  | 0.598858000000  |
| Be | 1.085258000000  | 0.000000000000  | −1.278866000000 |
| Be | 1.052108000000  | −1.124714000000 | 0.598858000000  |
| Be | −1.052108000000 | 1.124714000000  | 0.598858000000  |
| Be | −1.085258000000 | 0.000000000000  | −1.278866000000 |
| Be | −1.052108000000 | −1.124714000000 | 0.598858000000  |

17

1.487802500      Be6B11\_0004.out

|    |                 |                 |                 |
|----|-----------------|-----------------|-----------------|
| B  | −0.809816000000 | 1.579400000000  | 0.643022000000  |
| Be | 0.596573000000  | −0.814845000000 | 2.010115000000  |
| B  | 0.051091000000  | 1.760054000000  | −0.791777000000 |
| B  | 1.580974000000  | 1.309936000000  | −0.966076000000 |
| B  | −2.070825000000 | 0.461623000000  | 0.890950000000  |
| B  | −0.603948000000 | 0.506270000000  | 1.857829000000  |
| B  | 2.628206000000  | 0.531768000000  | −0.066162000000 |
| Be | 0.883805000000  | 0.850245000000  | 0.737351000000  |
| Be | −0.903703000000 | −1.025277000000 | 0.582096000000  |
| B  | −2.628548000000 | −0.531967000000 | −0.178140000000 |
| B  | −1.569501000000 | −1.073309000000 | −1.210345000000 |
| B  | −0.048006000000 | −1.595631000000 | −1.037654000000 |
| Be | 1.608400000000  | −0.779034000000 | −1.006380000000 |
| Be | 0.006693000000  | 0.158977000000  | −1.774212000000 |
| Be | −1.600348000000 | 0.919041000000  | −0.888479000000 |
| B  | 2.151414000000  | −0.709603000000 | 0.737654000000  |
| B  | 0.845823000000  | −1.685827000000 | 0.392307000000  |

17

2.377597500      Be6B11\_0005.out

|   |                 |                 |                 |
|---|-----------------|-----------------|-----------------|
| B | −1.398792000000 | −2.376827000000 | −0.608428000000 |
| B | 1.860269000000  | 1.944117000000  | 0.832486000000  |

|    |                 |                 |                 |
|----|-----------------|-----------------|-----------------|
| B  | 0.000000000000  | -2.314681000000 | -1.284177000000 |
| B  | 1.398792000000  | 2.376827000000  | -0.608428000000 |
| B  | -1.860269000000 | -1.944117000000 | 0.832486000000  |
| B  | 1.198910000000  | 1.039826000000  | 1.873576000000  |
| Be | -0.846279000000 | -0.686255000000 | -1.602453000000 |
| B  | 0.000000000000  | 2.314681000000  | -1.284177000000 |
| Be | 0.026437000000  | -1.647024000000 | 0.486714000000  |
| Be | 1.524481000000  | 0.000032000000  | 0.331634000000  |
| B  | 0.978975000000  | -1.100162000000 | -1.127179000000 |
| Be | -0.026437000000 | 1.647024000000  | 0.486714000000  |
| B  | -1.198910000000 | -1.039826000000 | 1.873576000000  |
| B  | -0.978975000000 | 1.100162000000  | -1.127179000000 |
| Be | -1.524481000000 | -0.000032000000 | 0.331634000000  |
| Be | 0.846279000000  | 0.686255000000  | -1.602453000000 |
| B  | 0.000000000000  | 0.000000000000  | 1.882013000000  |

17

2.383245000 Be6B11\_0006.out

|    |                 |                 |                 |
|----|-----------------|-----------------|-----------------|
| Be | 0.000000000000  | 1.524670000000  | 0.325548000000  |
| Be | 0.000000000000  | -1.524670000000 | 0.325548000000  |
| Be | -1.646433000000 | 0.020113000000  | 0.488496000000  |
| Be | 1.646433000000  | -0.020113000000 | 0.488496000000  |
| B  | 1.104502000000  | -0.972620000000 | -1.129209000000 |
| B  | -1.104502000000 | 0.972620000000  | -1.129209000000 |
| B  | 0.000000000000  | 0.000000000000  | 1.882165000000  |
| Be | -0.681645000000 | -0.847320000000 | -1.608316000000 |
| Be | 0.681645000000  | 0.847320000000  | -1.608316000000 |
| B  | 1.033017000000  | 1.204123000000  | 1.875487000000  |
| B  | -1.033017000000 | -1.204123000000 | 1.875487000000  |
| B  | -2.314461000000 | -0.012187000000 | -1.282308000000 |
| B  | 2.314461000000  | 0.012187000000  | -1.282308000000 |
| B  | -1.936501000000 | -1.869964000000 | 0.837138000000  |
| B  | 1.936501000000  | 1.869964000000  | 0.837138000000  |
| B  | 2.363598000000  | 1.412169000000  | -0.606771000000 |
| B  | -2.363598000000 | -1.412169000000 | -0.606771000000 |

17

5.164952500 Be6B11\_0007.out

|    |                 |                 |                 |
|----|-----------------|-----------------|-----------------|
| Be | -1.140416000000 | 0.103343000000  | 1.097260000000  |
| Be | 1.140416000000  | -0.103343000000 | 1.097260000000  |
| B  | 1.806969000000  | 1.963089000000  | -0.386217000000 |
| B  | -1.542626000000 | -1.932366000000 | 1.133568000000  |
| Be | 0.000000000000  | 1.577206000000  | 0.008758000000  |
| B  | -0.638597000000 | -1.316233000000 | 2.228919000000  |

|    |                 |                 |                 |
|----|-----------------|-----------------|-----------------|
| B  | 1.542626000000  | 1.932366000000  | 1.133568000000  |
| B  | 0.000000000000  | 0.000000000000  | 2.724881000000  |
| B  | 0.638597000000  | 1.316233000000  | 2.228919000000  |
| Be | 0.000000000000  | -1.577206000000 | 0.008758000000  |
| Be | -1.148876000000 | 0.082815000000  | -1.070831000000 |
| B  | 1.176139000000  | 1.697602000000  | -1.775334000000 |
| Be | 1.148876000000  | -0.082815000000 | -1.070831000000 |
| B  | -1.806969000000 | -1.963089000000 | -0.386217000000 |
| B  | 0.326002000000  | 0.702995000000  | -2.591527000000 |
| B  | -1.176139000000 | -1.697602000000 | -1.775334000000 |
| B  | -0.326002000000 | -0.702995000000 | -2.591527000000 |

17

5.631185000 Be6B11\_0008.out

|    |                 |                 |                 |
|----|-----------------|-----------------|-----------------|
| B  | 1.528679000000  | 1.701700000000  | 0.509569000000  |
| B  | -0.117021000000 | -0.964914000000 | -1.615283000000 |
| B  | -1.648819000000 | -0.707237000000 | -1.161047000000 |
| Be | -0.302031000000 | -1.449462000000 | 0.175321000000  |
| B  | 2.641512000000  | -0.596366000000 | -0.644848000000 |
| Be | -1.789419000000 | 1.565781000000  | 0.309923000000  |
| Be | 1.619805000000  | -0.697074000000 | 0.999108000000  |
| B  | -1.341198000000 | -0.925353000000 | 1.696499000000  |
| B  | 1.342610000000  | -1.332495000000 | -1.175056000000 |
| Be | -0.127111000000 | 0.623224000000  | 1.414746000000  |
| Be | -0.940410000000 | 0.987997000000  | -1.391875000000 |
| Be | 1.010995000000  | 0.511028000000  | -0.864484000000 |
| B  | -2.628326000000 | 0.474501000000  | -0.801661000000 |
| B  | 0.139389000000  | -1.127775000000 | 1.950483000000  |
| B  | 2.710593000000  | 0.706957000000  | 0.147077000000  |
| B  | 0.040832000000  | 1.912171000000  | 0.081513000000  |
| B  | -2.245715000000 | -0.374385000000 | 0.498565000000  |

17

10.209425000 Be6B11\_0009.out

|    |                 |                 |                 |
|----|-----------------|-----------------|-----------------|
| Be | 1.784070000000  | -0.881154000000 | 0.000000000000  |
| Be | -1.178349000000 | 1.635847000000  | 0.000000000000  |
| Be | 1.064755000000  | 1.033056000000  | 0.000000000000  |
| Be | -0.937588000000 | -0.323485000000 | 1.174575000000  |
| B  | -2.310757000000 | 0.242038000000  | 0.000000000000  |
| B  | 0.892147000000  | -0.081631000000 | -1.612675000000 |
| B  | 0.352235000000  | 1.385244000000  | 1.718054000000  |
| Be | -0.937588000000 | -0.323485000000 | -1.174575000000 |
| Be | -0.817189000000 | -2.391480000000 | 0.000000000000  |
| B  | 0.892147000000  | -0.081631000000 | 1.612675000000  |

|   |                 |                 |                 |
|---|-----------------|-----------------|-----------------|
| B | 0.621579000000  | -1.643571000000 | 1.185587000000  |
| B | -2.180768000000 | -1.259499000000 | 0.000000000000  |
| B | 0.352235000000  | 1.385244000000  | -1.718054000000 |
| B | 0.285545000000  | 2.649292000000  | 0.765420000000  |
| B | 1.006026000000  | -2.600648000000 | 0.000000000000  |
| B | 0.621579000000  | -1.643571000000 | -1.185587000000 |
| B | 0.285545000000  | 2.649292000000  | -0.765420000000 |

17

11.904302500 Be6B11\_0010.out

|    |                 |                 |                 |
|----|-----------------|-----------------|-----------------|
| Be | -0.967864000000 | -0.003324000000 | -2.025249000000 |
| Be | -0.977869000000 | -0.908311000000 | 1.005310000000  |
| Be | 0.977869000000  | 0.908311000000  | 1.005310000000  |
| Be | 0.967864000000  | 0.003324000000  | -2.025249000000 |
| Be | -1.631200000000 | 0.684878000000  | -0.239010000000 |
| B  | 0.932498000000  | -0.979840000000 | 1.526020000000  |
| B  | -0.932498000000 | 0.979840000000  | 1.526020000000  |
| Be | 1.631200000000  | -0.684878000000 | -0.239010000000 |
| B  | 1.725675000000  | 1.166405000000  | -0.793865000000 |
| B  | 0.000000000000  | -1.306175000000 | -1.105711000000 |
| B  | 0.000000000000  | 1.306175000000  | -1.105711000000 |
| B  | 0.440133000000  | -2.107280000000 | 0.385744000000  |
| B  | -1.725675000000 | -1.166405000000 | -0.793865000000 |
| B  | -0.440133000000 | 2.107280000000  | 0.385744000000  |
| B  | 0.995287000000  | 2.407450000000  | -0.164110000000 |
| B  | -0.995287000000 | -2.407450000000 | -0.164110000000 |
| B  | 0.000000000000  | 0.000000000000  | 2.318162000000  |

17

14.065412500 Be6B11\_0011.out

|    |                 |                 |                 |
|----|-----------------|-----------------|-----------------|
| Be | 2.136962000000  | 0.466122000000  | -0.136821000000 |
| Be | -2.136962000000 | -0.466122000000 | -0.136821000000 |
| Be | 0.448793000000  | 1.453418000000  | 0.501781000000  |
| Be | -0.448793000000 | -1.453418000000 | 0.501781000000  |
| B  | -1.013219000000 | -1.183852000000 | -1.416467000000 |
| B  | 1.013219000000  | 1.183852000000  | -1.416467000000 |
| B  | -1.516619000000 | -0.303767000000 | 1.526878000000  |
| Be | 0.858236000000  | -0.661623000000 | -1.331966000000 |
| Be | -0.858236000000 | 0.661623000000  | -1.331966000000 |
| B  | 1.516619000000  | 0.303767000000  | 1.526878000000  |
| B  | 0.000000000000  | 0.000000000000  | 1.865341000000  |
| B  | 0.000000000000  | 2.333754000000  | -1.105419000000 |
| B  | 0.000000000000  | -2.333754000000 | -1.105419000000 |
| B  | 1.546339000000  | -1.193439000000 | 0.921284000000  |

|   |                 |                 |                 |
|---|-----------------|-----------------|-----------------|
| B | -1.546339000000 | 1.193439000000  | 0.921284000000  |
| B | -1.178288000000 | 2.314234000000  | -0.085342000000 |
| B | 1.178288000000  | -2.314234000000 | -0.085342000000 |

17

25.153337500 Be6B11\_0012.out

|    |                 |                 |                 |
|----|-----------------|-----------------|-----------------|
| Be | -1.277429000000 | 1.666744000000  | 0.000000000000  |
| B  | -1.541731000000 | -2.135511000000 | 0.000000000000  |
| Be | -0.626280000000 | -1.277275000000 | 1.405826000000  |
| B  | -0.006859000000 | -2.441749000000 | 0.000000000000  |
| Be | -0.626280000000 | -1.277275000000 | -1.405826000000 |
| B  | 1.212038000000  | -1.565687000000 | 0.808025000000  |
| B  | 0.037720000000  | 1.982302000000  | 1.348142000000  |
| B  | -0.811599000000 | 0.576246000000  | 1.455720000000  |
| B  | 1.777627000000  | -0.269016000000 | 0.000000000000  |
| Be | 0.926136000000  | 0.082001000000  | -1.658674000000 |
| Be | 0.926136000000  | 0.082001000000  | 1.658674000000  |
| B  | 0.037720000000  | 1.982302000000  | -1.348142000000 |
| B  | 1.212038000000  | -1.565687000000 | -0.808025000000 |
| Be | -1.878824000000 | -0.366759000000 | 0.000000000000  |
| B  | -0.811599000000 | 0.576246000000  | -1.455720000000 |
| B  | 0.324901000000  | 2.740038000000  | 0.000000000000  |
| B  | 0.614978000000  | 0.992966000000  | 0.000000000000  |

17

42.350602500 Be6B11\_0013.out

|    |                 |                 |                 |
|----|-----------------|-----------------|-----------------|
| Be | -0.000618000000 | 1.265154000000  | -1.244622000000 |
| Be | 0.000618000000  | -1.265154000000 | -1.244622000000 |
| B  | -0.768950000000 | -0.000057000000 | -2.360234000000 |
| Be | 1.577107000000  | 0.000458000000  | 1.121963000000  |
| B  | 0.001596000000  | 1.217530000000  | 1.359563000000  |
| B  | -1.321661000000 | 1.600756000000  | 0.207885000000  |
| B  | 1.321661000000  | -1.600756000000 | 0.207885000000  |
| Be | -1.852297000000 | -0.000057000000 | -0.867758000000 |
| B  | 1.322470000000  | 1.601879000000  | 0.207441000000  |
| B  | -1.322470000000 | -1.601879000000 | 0.207441000000  |
| B  | 0.768950000000  | 0.000057000000  | -2.360234000000 |
| B  | 0.000000000000  | 0.000000000000  | 2.355612000000  |
| Be | -1.577107000000 | -0.000458000000 | 1.121963000000  |
| Be | 1.852297000000  | 0.000057000000  | -0.867758000000 |
| B  | 0.000000000000  | 2.439167000000  | 0.199873000000  |
| B  | -0.001596000000 | -1.217530000000 | 1.359563000000  |
| B  | 0.000000000000  | -2.439167000000 | 0.199873000000  |
