# Supplementary figures and images for: Exploration of Free Energy Surface and Thermal Effects on Relative Population and Infrared Spectrum of the Be6B11− Fluxional Cluster
Source: MDPI journal article supplement (doi:10.3390/ma14010112), 2020-12-29

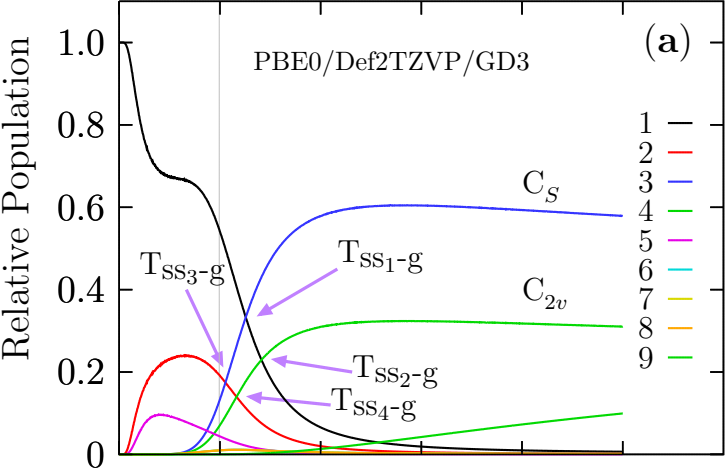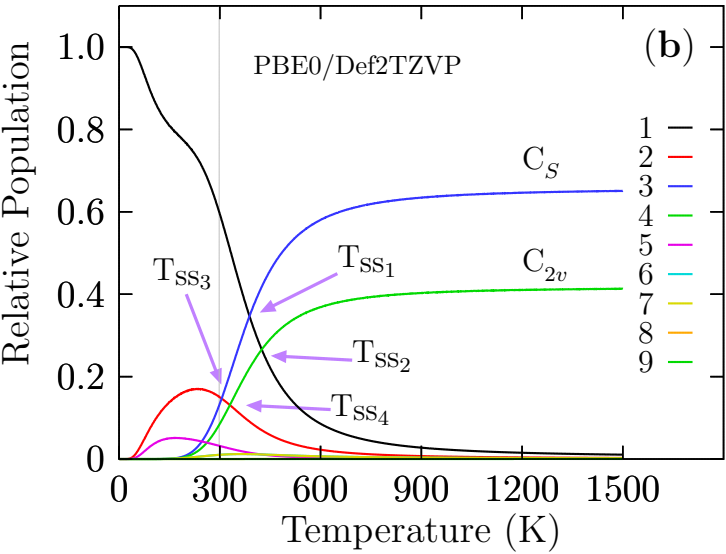

Supplement: s1 [file s1]

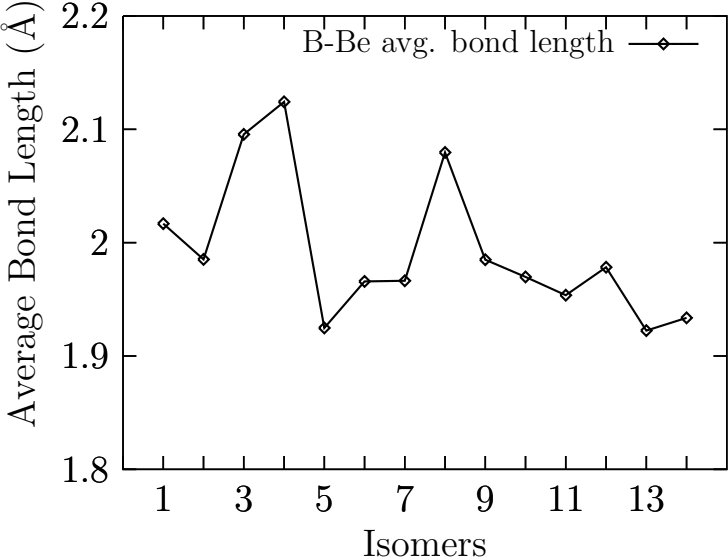

Supplement: s1 [file s1]

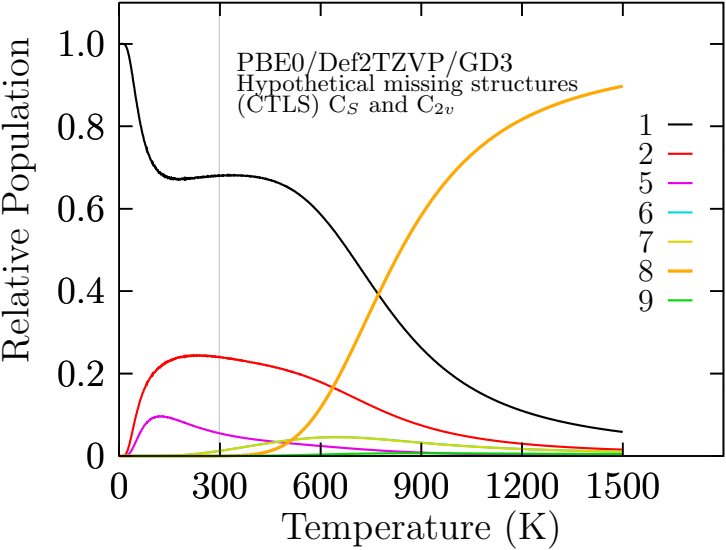

Supplement: s1 [file s1]

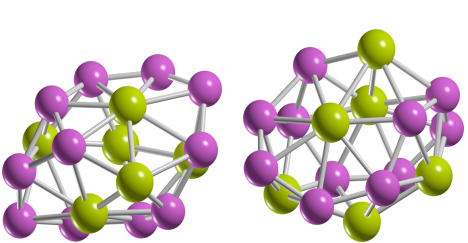

1(0.0)[**0.0**]

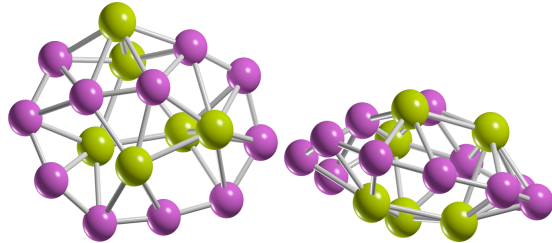

2(1.75)[**0.58**]

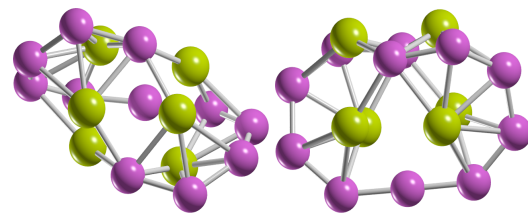

3(1.84)[**0.86**]

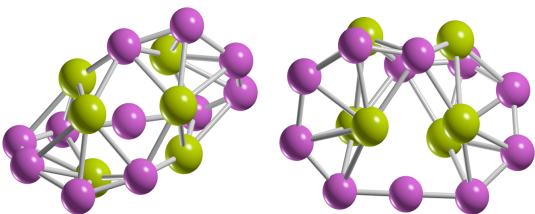

4(1.84)[**0.85**]

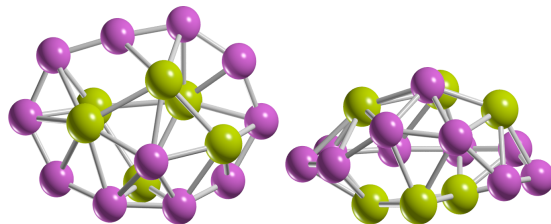

5(2.42)[**1.81**]

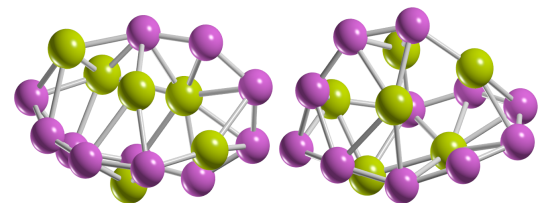

6(2.64)[**1.68**]

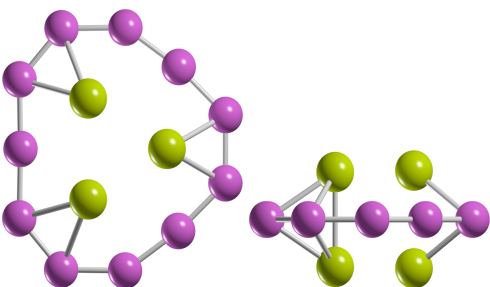

7(4.10)[**1.19**]

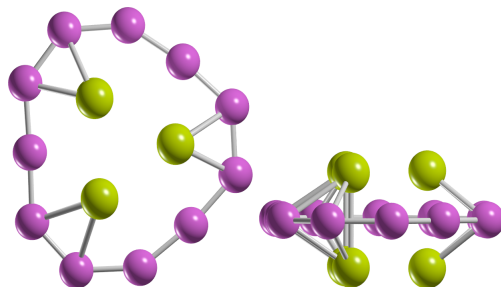

8(4.13)[**1.23**]

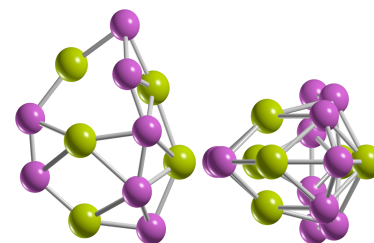

9(5.57)[**4.46**]

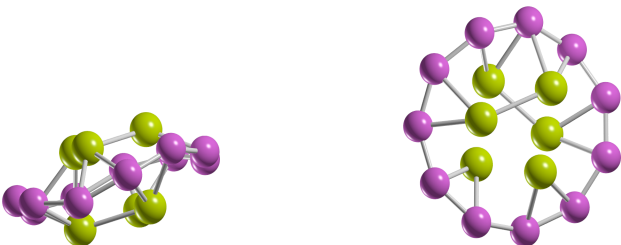

10(9.20)[**5.16**]

Supplement: s1 [file s1]

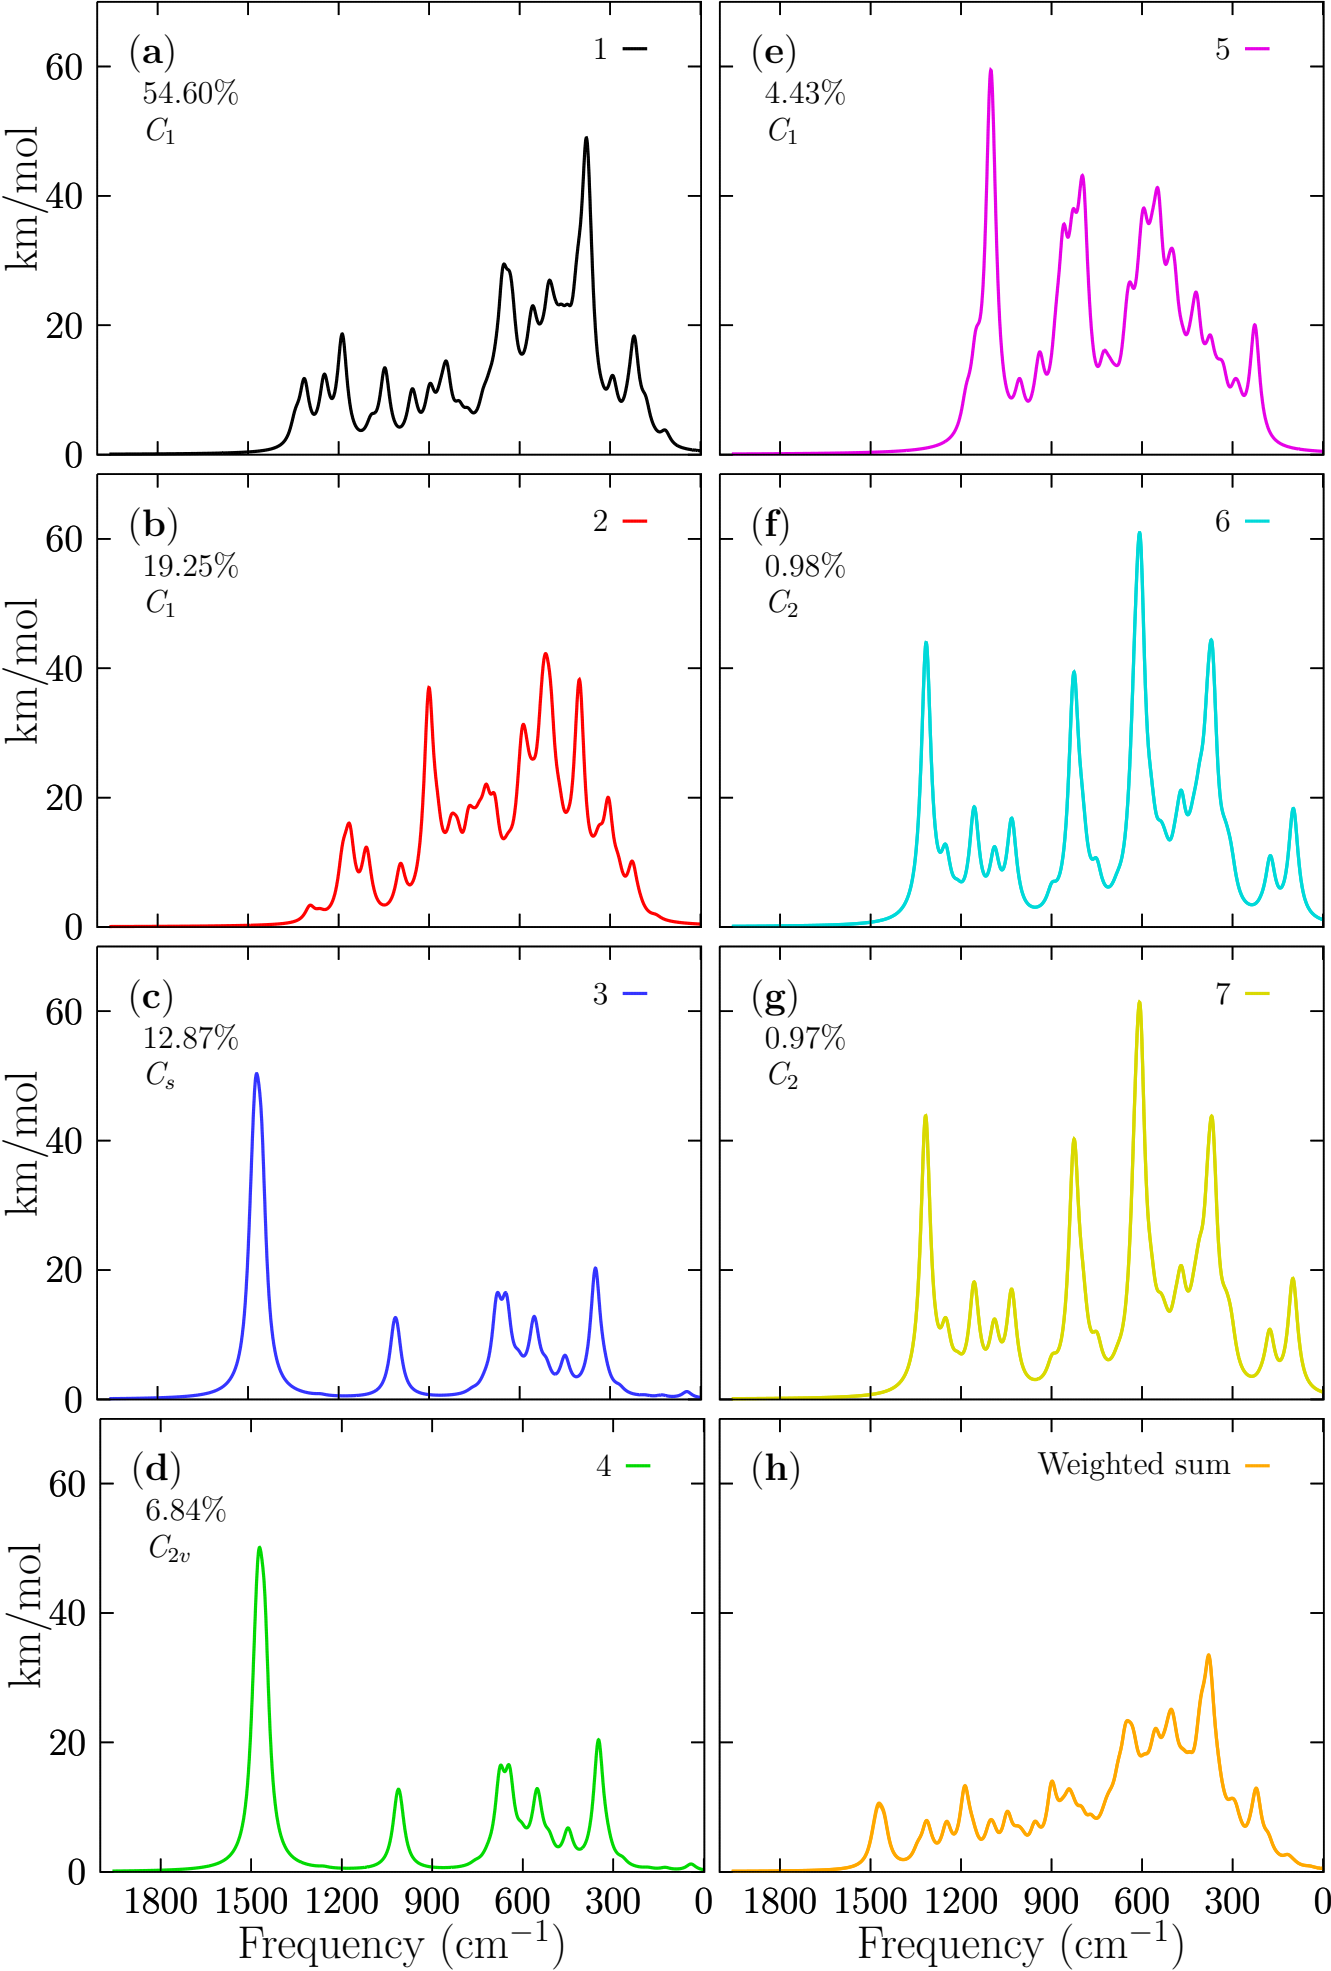

Supplement: s1 [file s1]

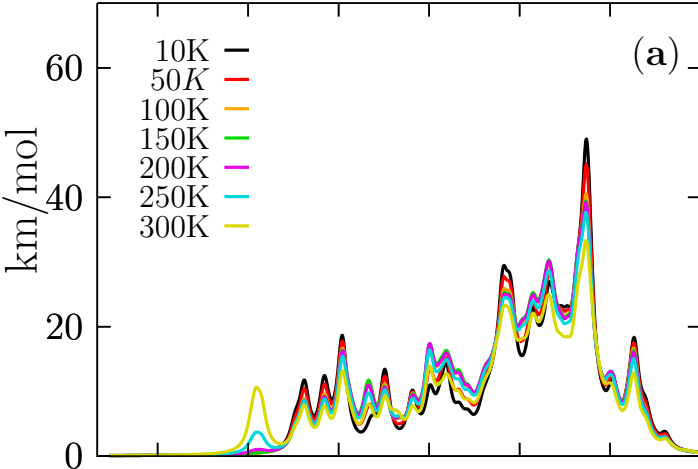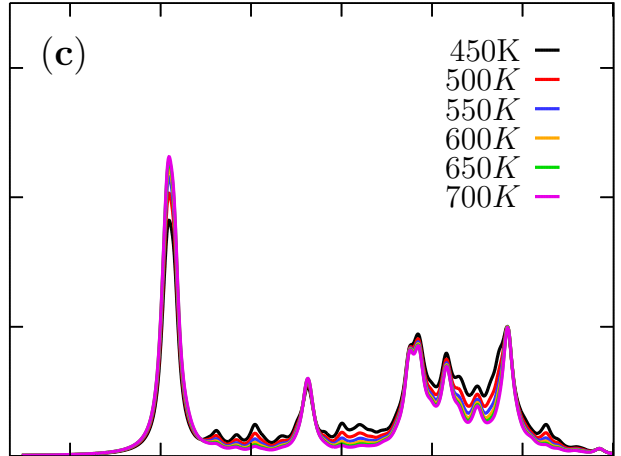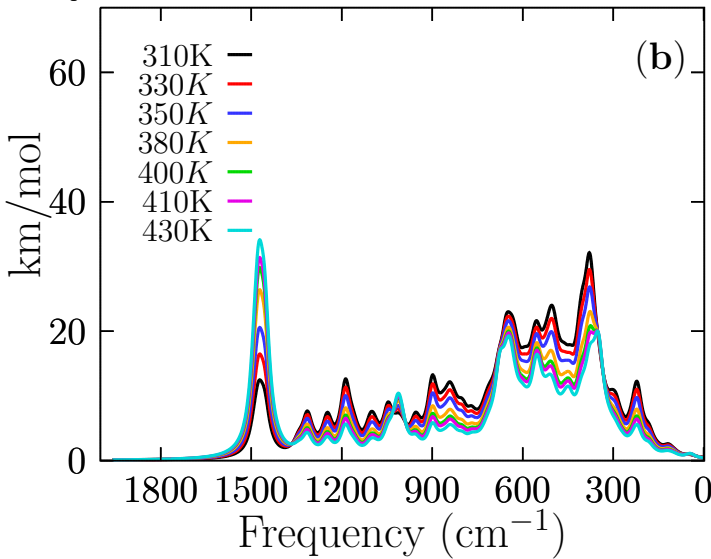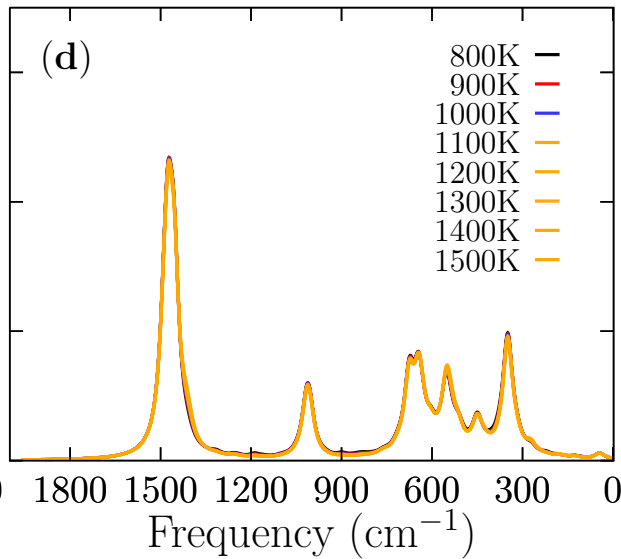

Supplement: s1 [file s1]

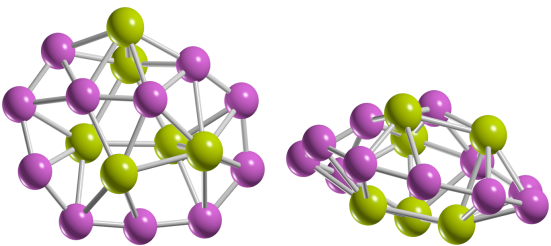

1(0.0)[**54.62%**]

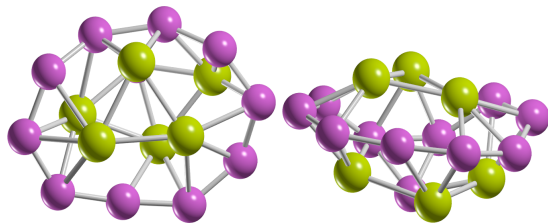

2(0.61)[**19.23%**]

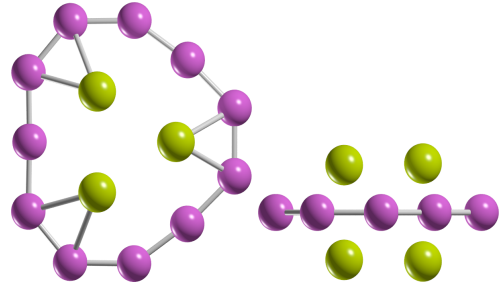

3(0.85)[**12.89%**]

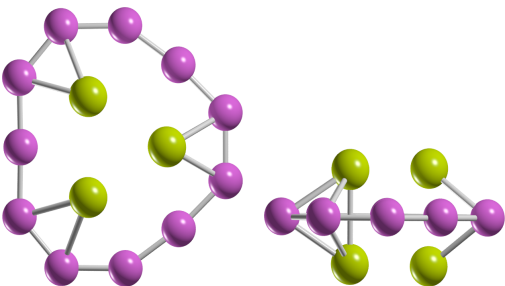

4(1.23)[**6.84%**]

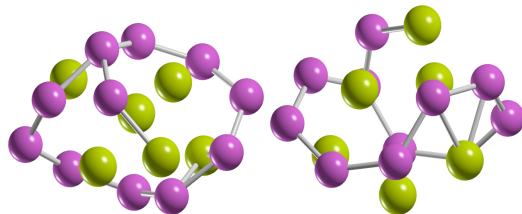

5(1.48)[**4.42%**]

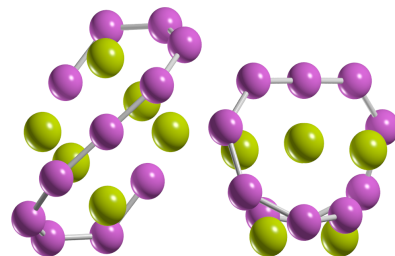

6(2.37)[**0.98%**]

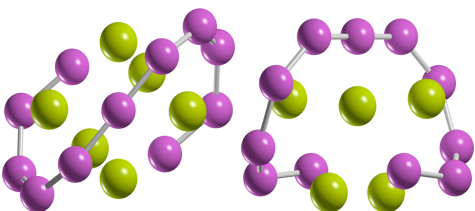

7(2.38)[**0.97%**]

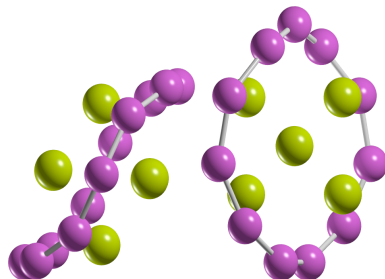

8(5.16)[**0.0%**]

Supplement: s1 [file s1]

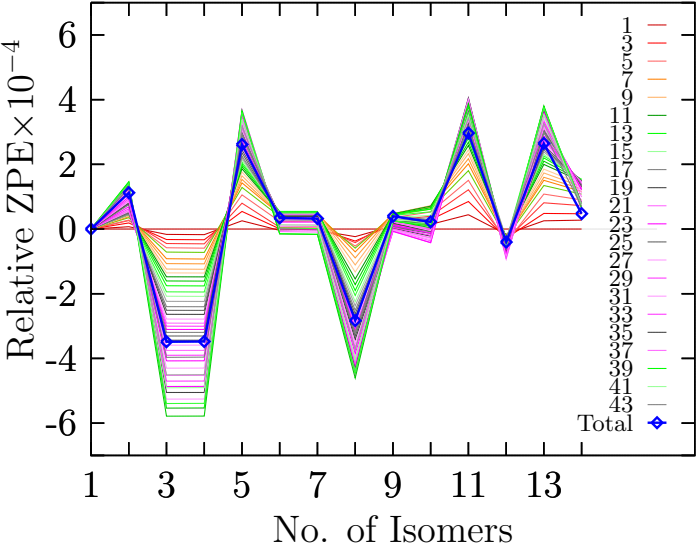

Supplement: s1 [file s1]

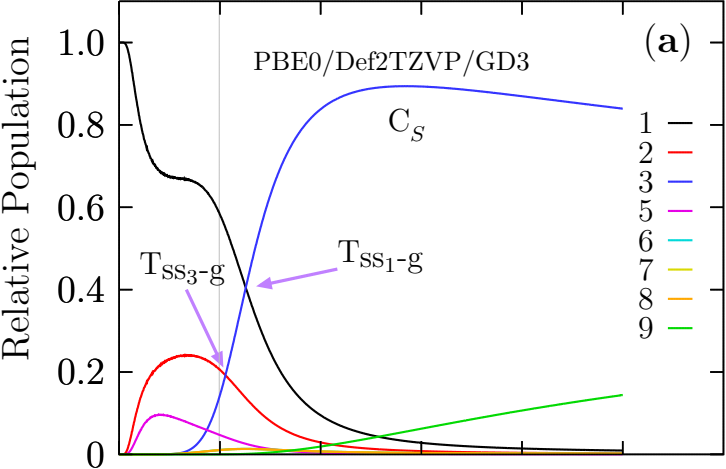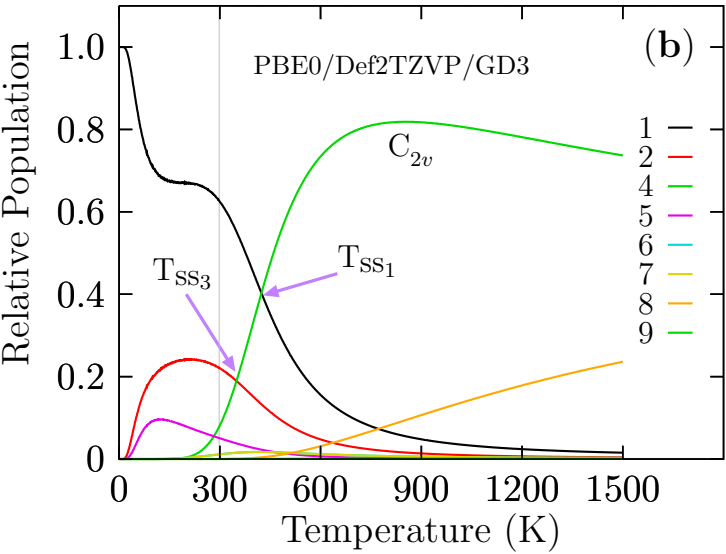

Supplement: s1 [file s1]

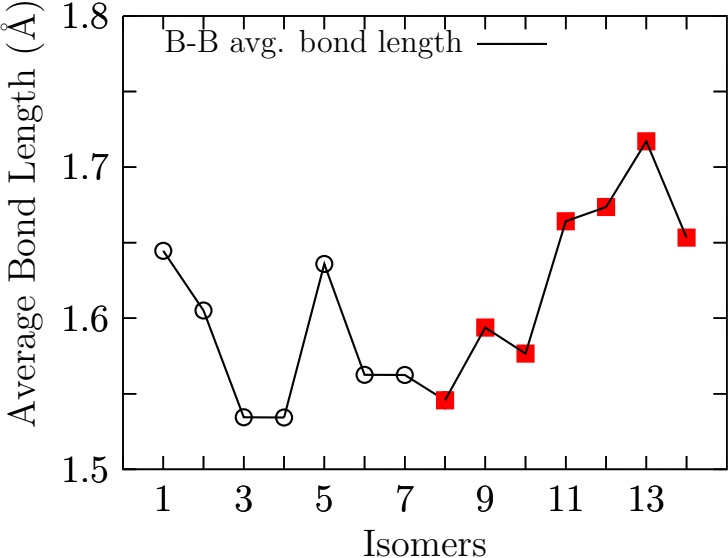

Supplement: s1 [file s1]
